# Supplementary material for: Formation of methane clathrates in carbon nanotubes: a molecular dynamics study
Source: Royal Society of Chemistry journal article supplement (doi:10.1039/c8nj00618k), 2018-01-01

## Supporting information

**Fig. S1.** The snapshots of the side view of the different systems.

**a)** (13,0) CNT without methane

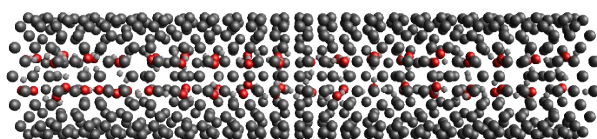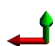

**b)** (13,0) CNT with methane

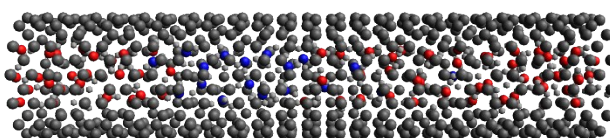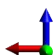

c) (14,0) CNT without methane

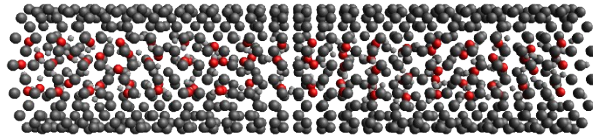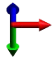

d) (14,0) CNT with methane

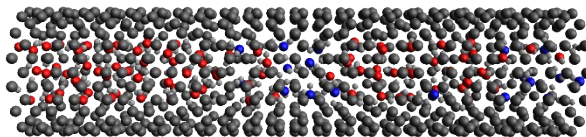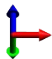

e) (15,0) CNT without methane

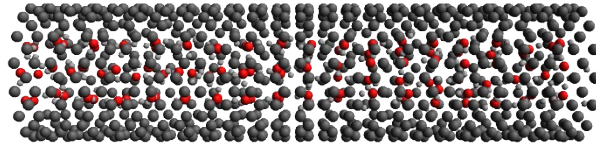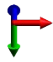

f) (15,0) CNT with methane

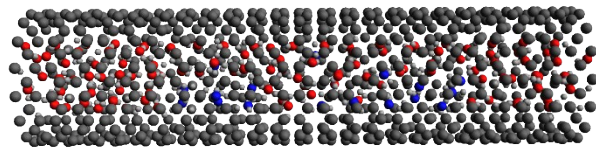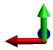

**g)** (16,0) CNT without methane

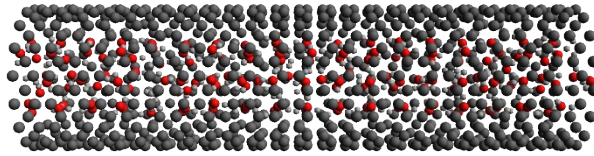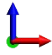

**h)** (16,0) CNT with methane

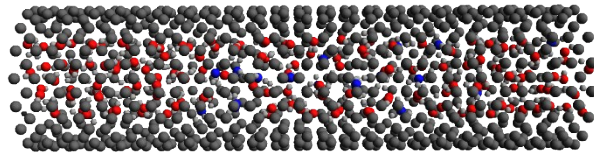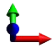

i) (17,0) CNT without methane

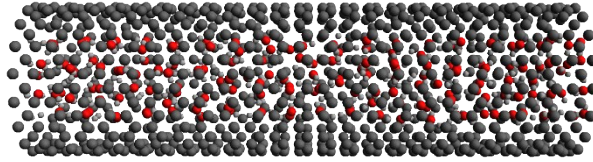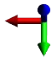

j) (17,0) CNT with methane

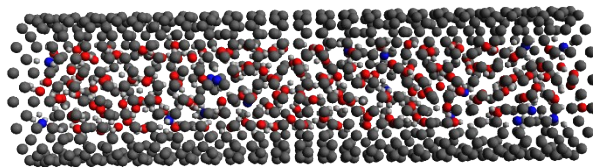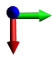

Supplement: c8nj00618k1.pdf [file c8nj00618k1.pdf]
